# Supplementary material for: Developing a light weight lithium ion battery – an effective material and electrode design for high performance conversion anodes
Source: Royal Society of Chemistry journal article supplement (doi:10.1039/c3ra23244a), 2013-01-01
Supplement: c3ra23244a.pdf [file c3ra23244a.pdf]

## Developing a light weight lithium ion battery - an effective material and electrode design for high performance conversion anodes

Srirama Hariharan, Vishwanathan Ramar, Shailendra P. Joshi and Palani Balaya\*

*Department of Mechanical Engineering, National University of Singapore,*

*Singapore-117576.*

\*E-mail: [mpepb@nus.edu.sg](mailto:mpepb@nus.edu.sg)

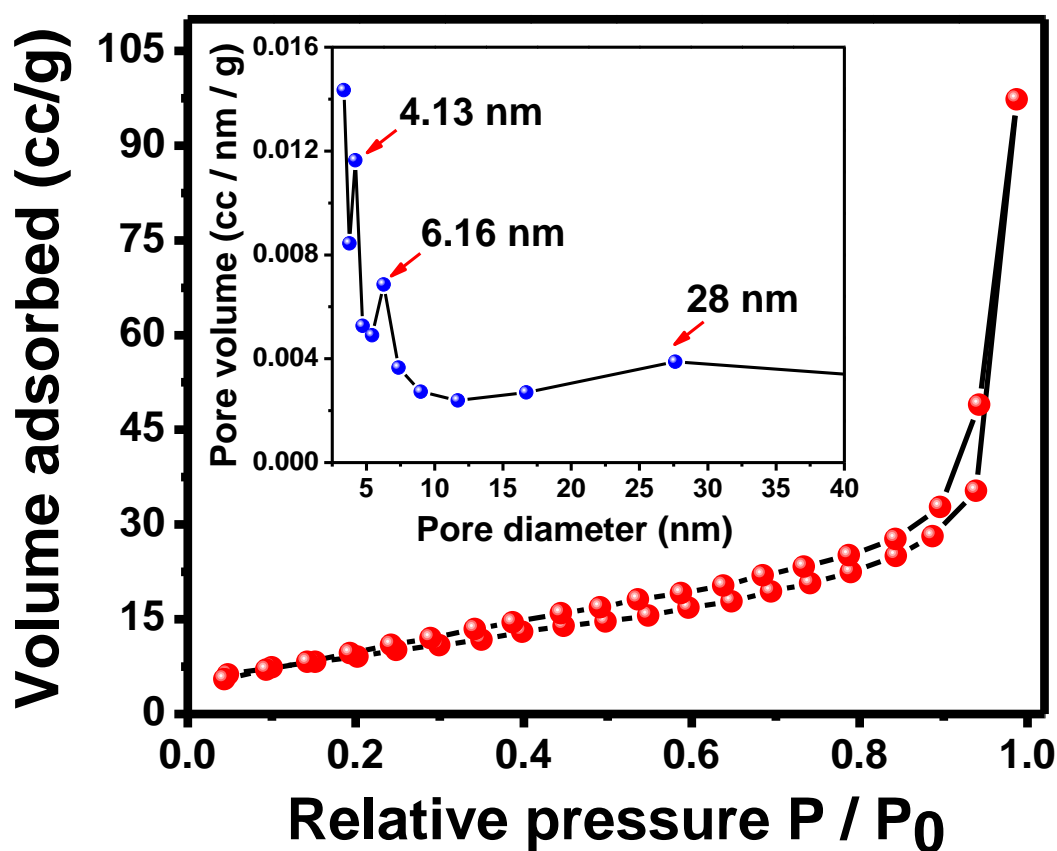

**Fig. S1.** N<sub>2</sub> sorption isotherm of the synthesized  $\alpha$ -Fe<sub>2</sub>O<sub>3</sub>. Inset showing BJH pore size distribution

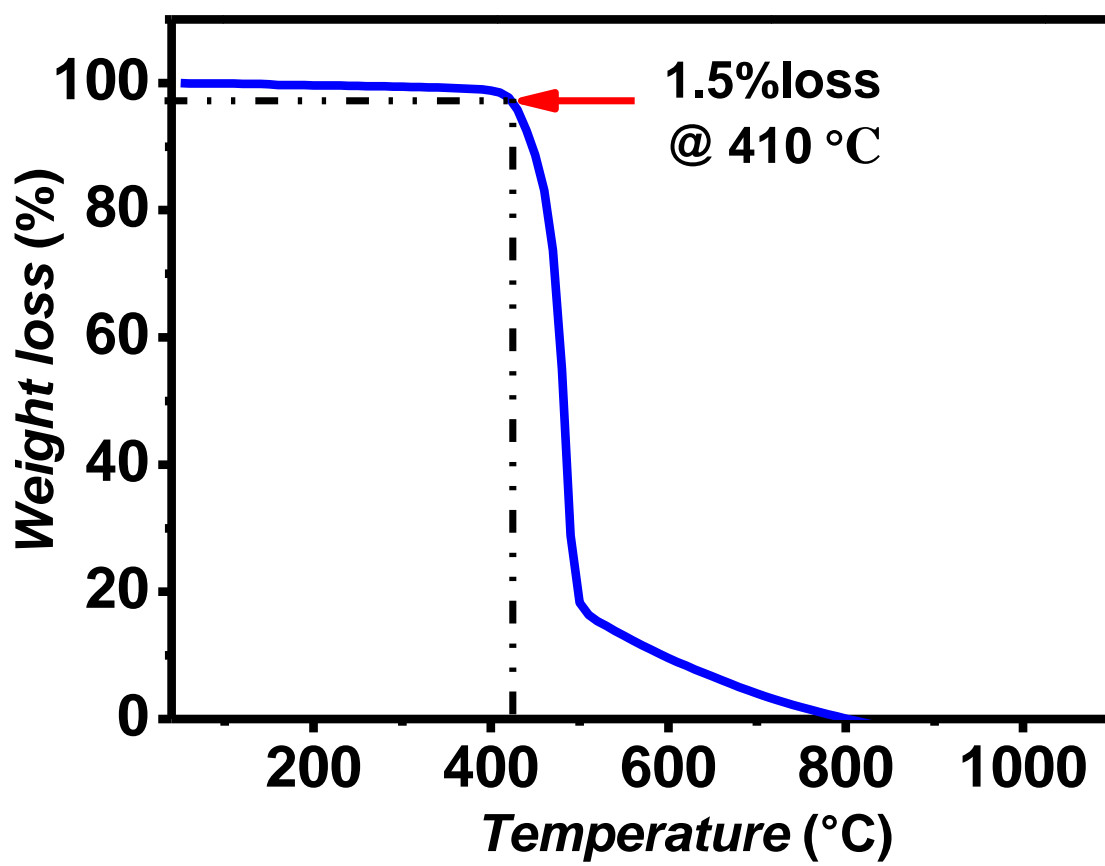

**Fig. S2.** TGA of the PVDF sample recorded from room temperature to 800 °C under inert atmosphere.

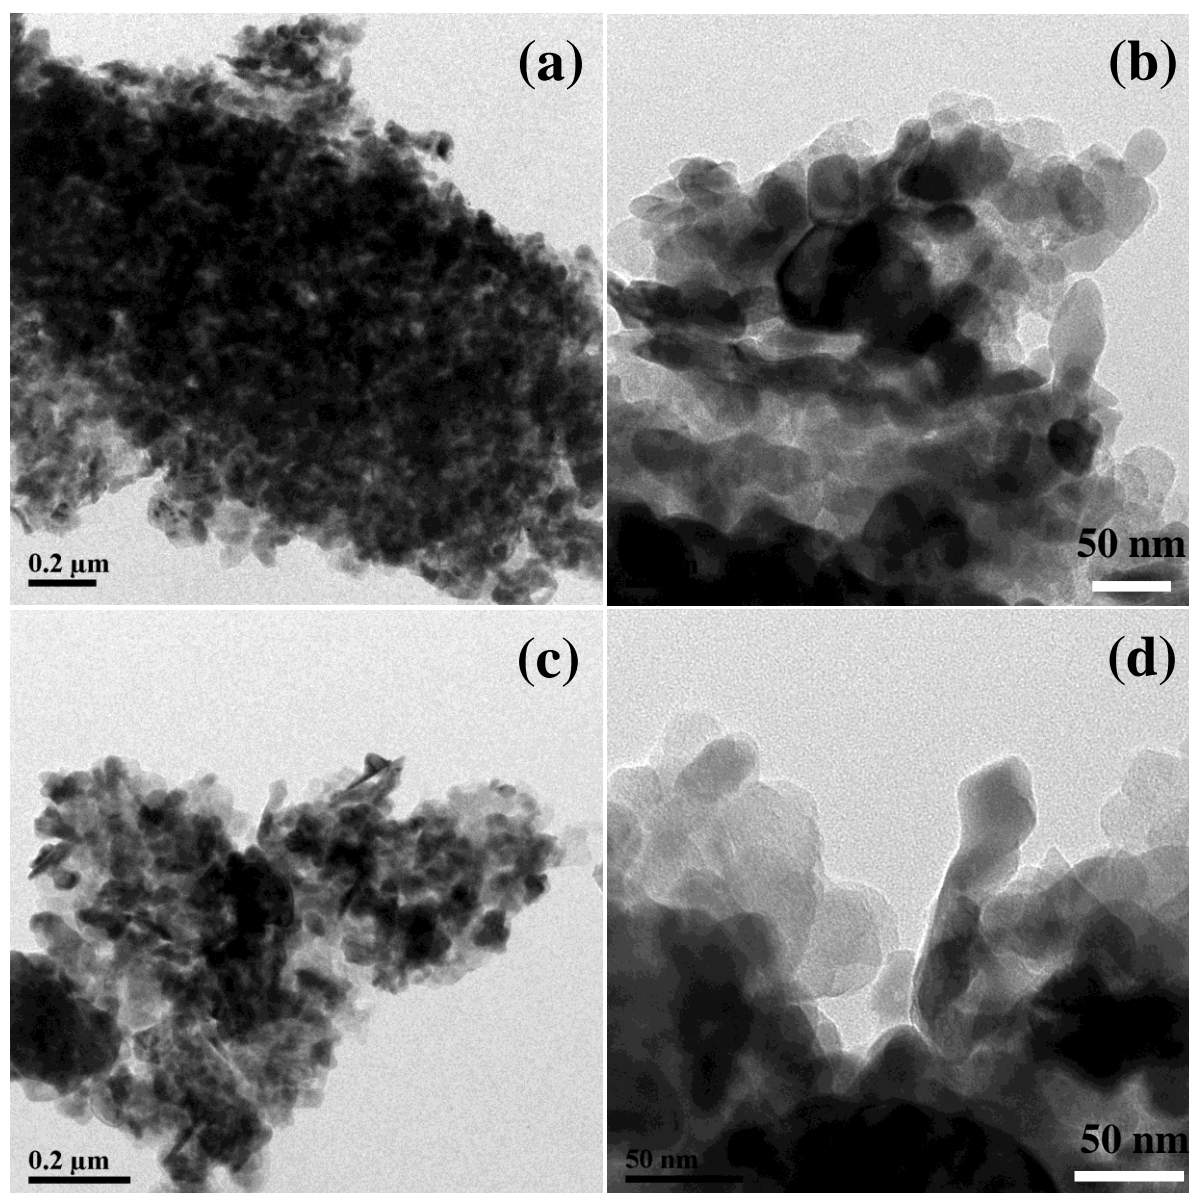

**Fig. S3.** (a) and (b) TEM images of the high temperature heated electrodes recorded at different magnifications. (c) and (d) TEM images of the conventionally dried electrodes at different magnifications.

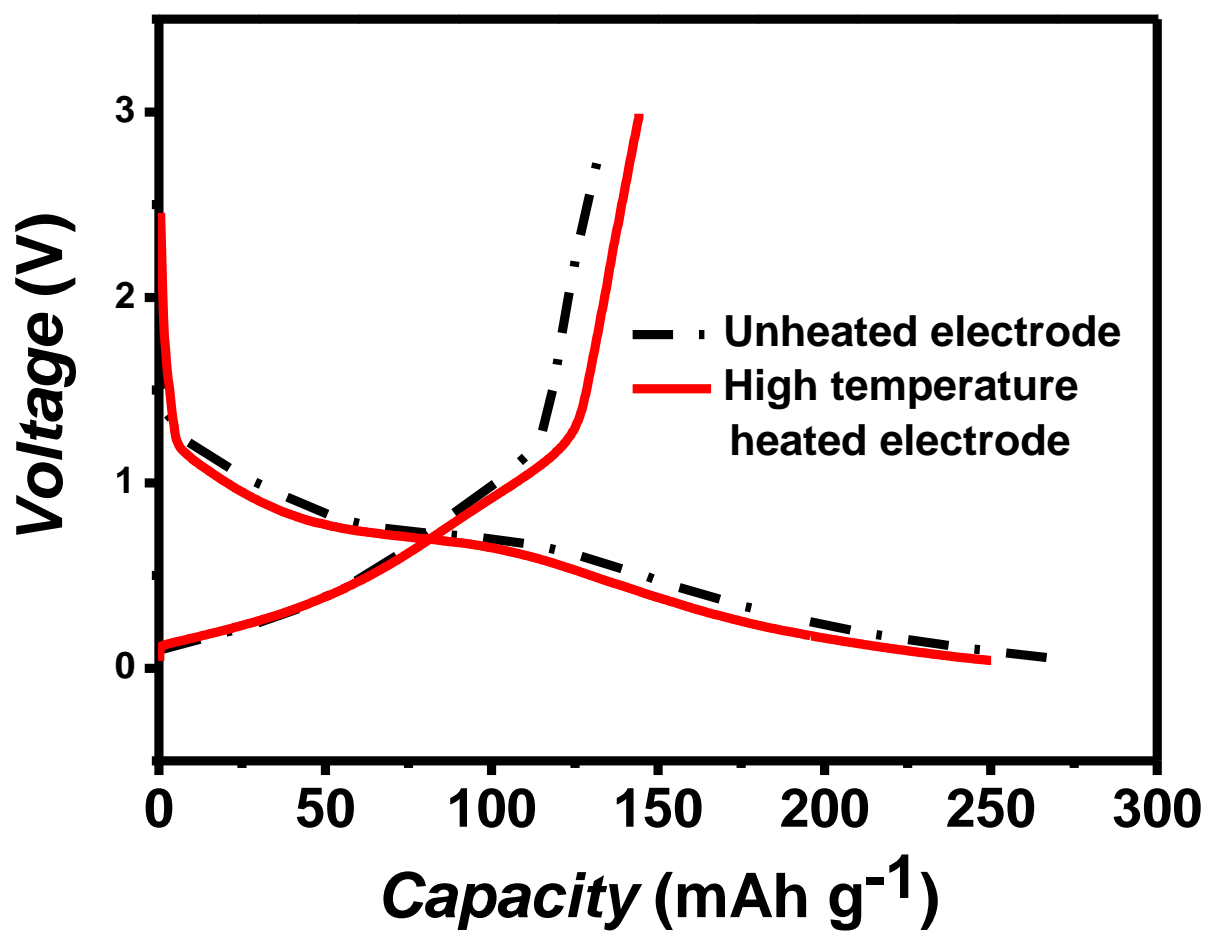

**Fig. S4.** Comparison of the first cycle reversibility of the unheated and high temperature heated composite electrodes. Note these electrodes contain carbon and PVDF in the weight ratio 90:10

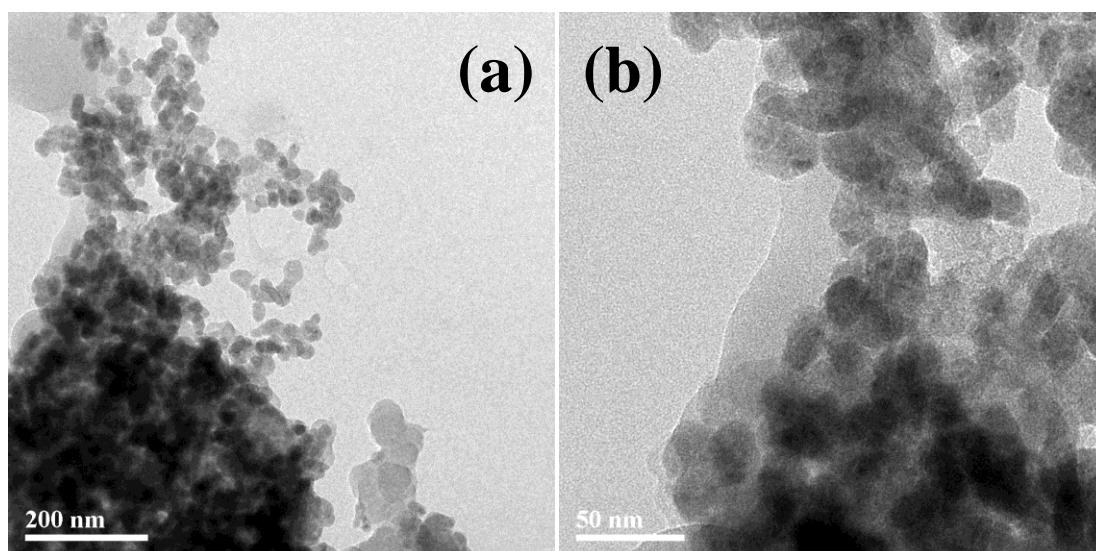

**Fig. S5** (a) and (b) TEM images of the electrodes taken after the first cycle of conversion reaction showing grain size reduction.

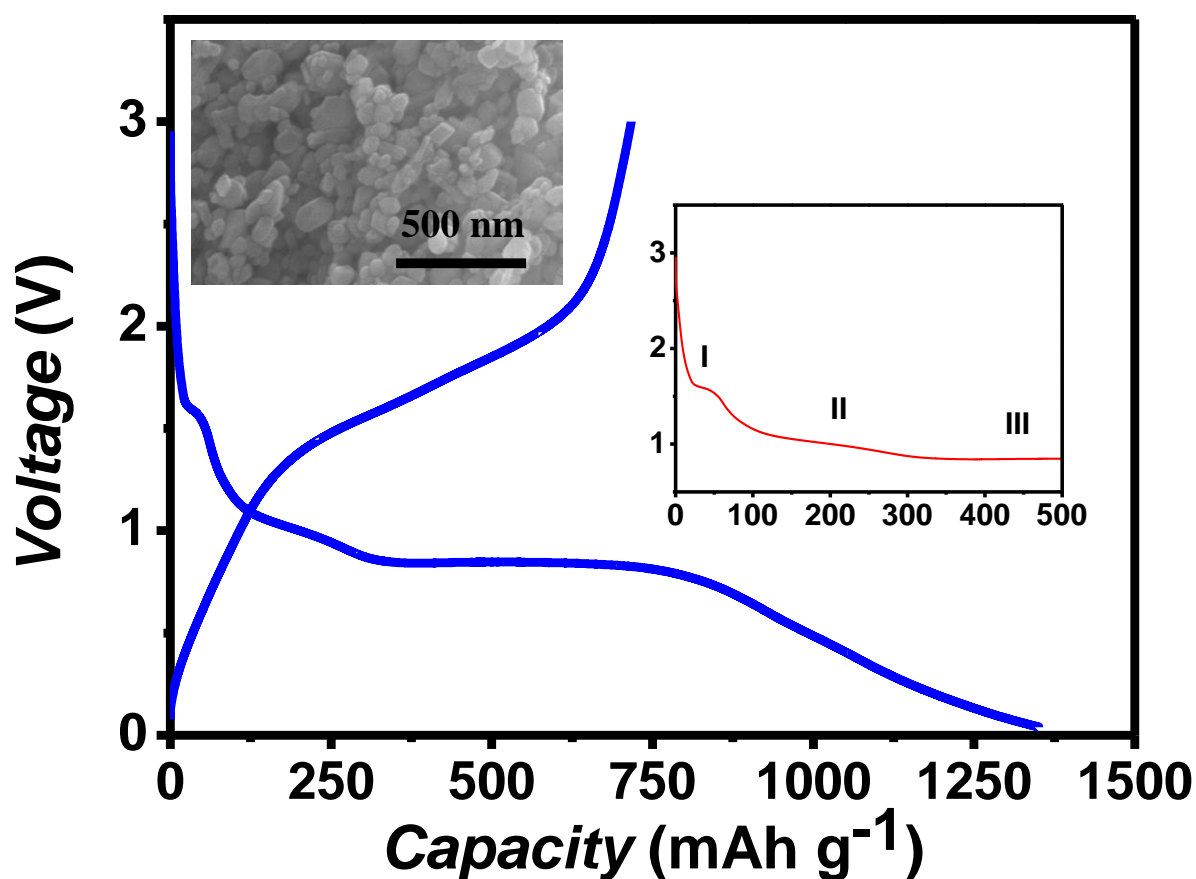

**Fig. S6** First cycle voltage profile of commercial  $\alpha$ -Fe<sub>2</sub>O<sub>3</sub> sample. Inset of this figure shows the FESEM image of the commercial sample and the magnified view of the first discharge profile with three distinct plateaus. Plateaus I and II represent the lithium insertion in Fe<sub>2</sub>O<sub>3</sub> while plateau III represents the conversion reaction.

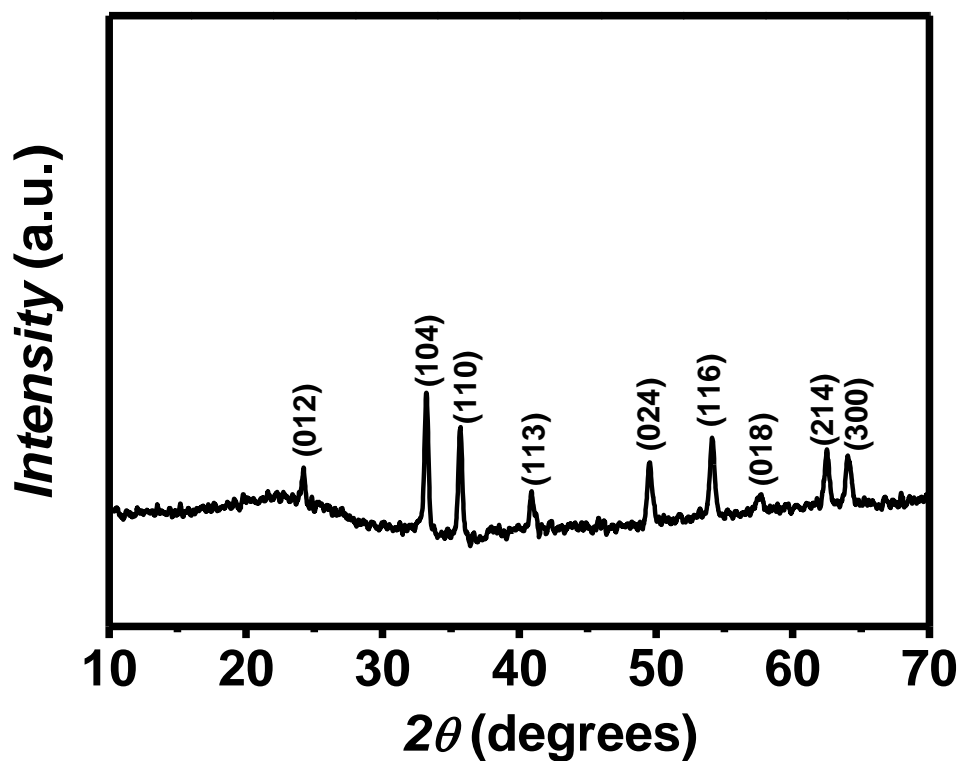

Fig. S7 XRD pattern of the commercial  $\alpha$ - $\text{Fe}_2\text{O}_3$  sample.

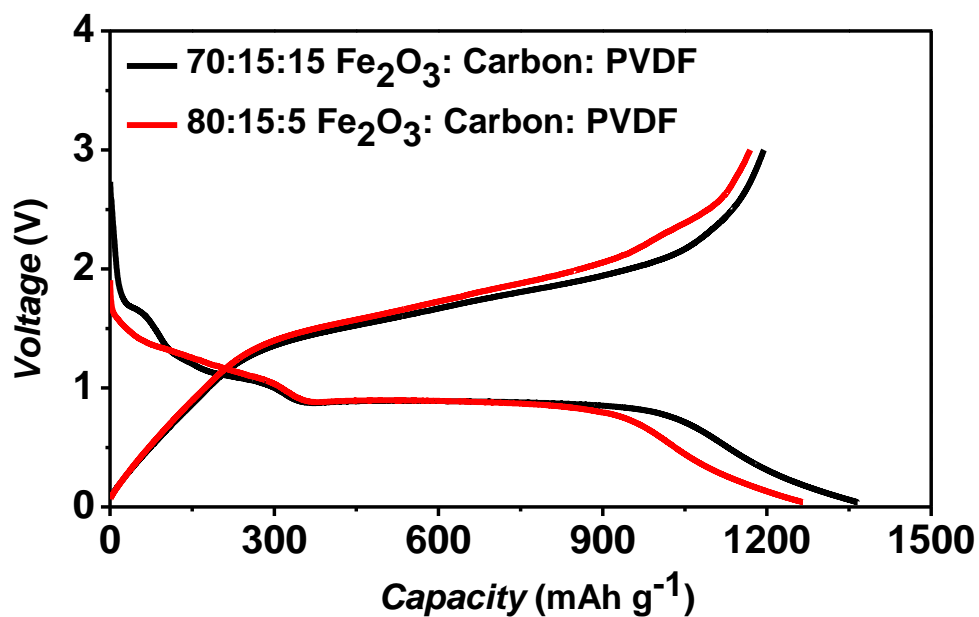

Fig. S8 First cycle galvanostatic voltage profile of the synthesized  $\alpha$ - $\text{Fe}_2\text{O}_3$  with different active material, carbon and binder composition.

The first cycle coulombic efficiency of 70:15:15 and 80:15:5 compositions (active material: carbon: binder) were found to be 91% and 88% respectively.

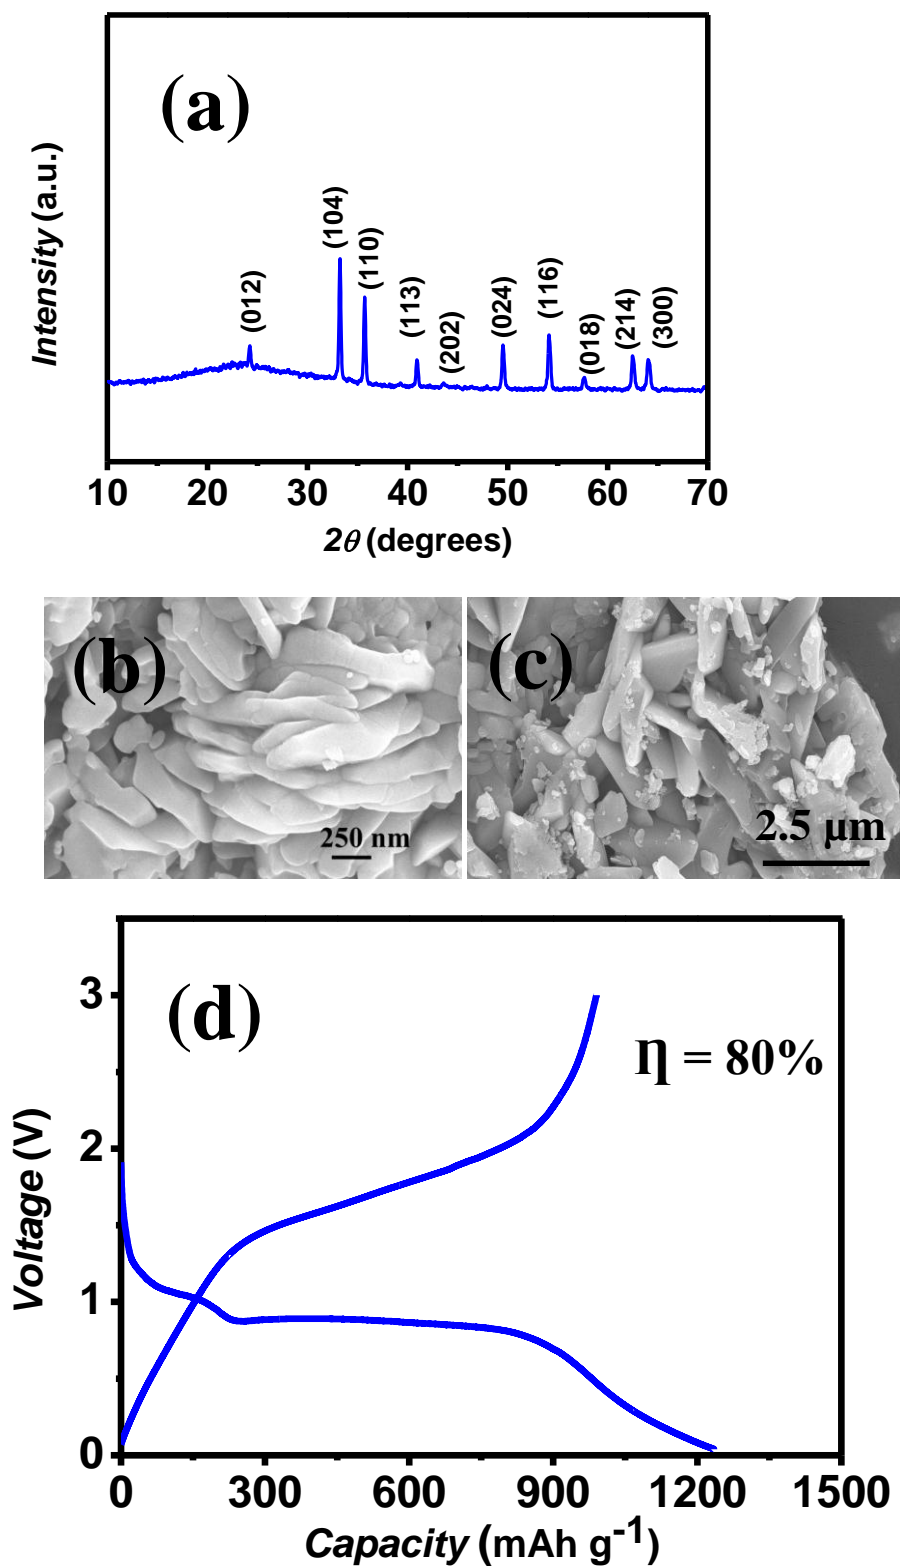

**Fig. S9** (a) XRD pattern of  $\alpha$ -Fe<sub>2</sub>O<sub>3</sub>-micron sample, (b) and (c) FESEM images, (d) First cycle voltage profile showing coulombic efficiency of 80%.

$\alpha$ -Fe<sub>2</sub>O<sub>3</sub>-micron was obtained by the soft template approach mentioned in the experimental section, except that the iron precursor was iron citrate.

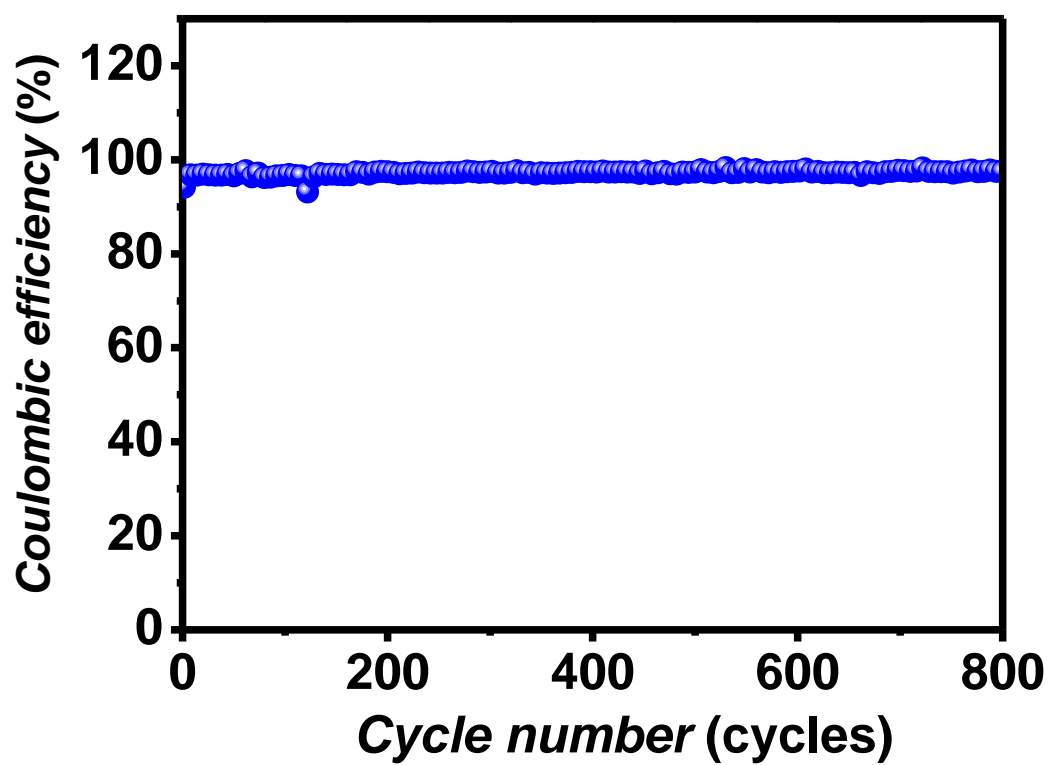

**Fig. S10** Variation of coulombic efficiency as a function of cycle number during the long term cycling of  $\alpha$ - $\text{Fe}_2\text{O}_3$



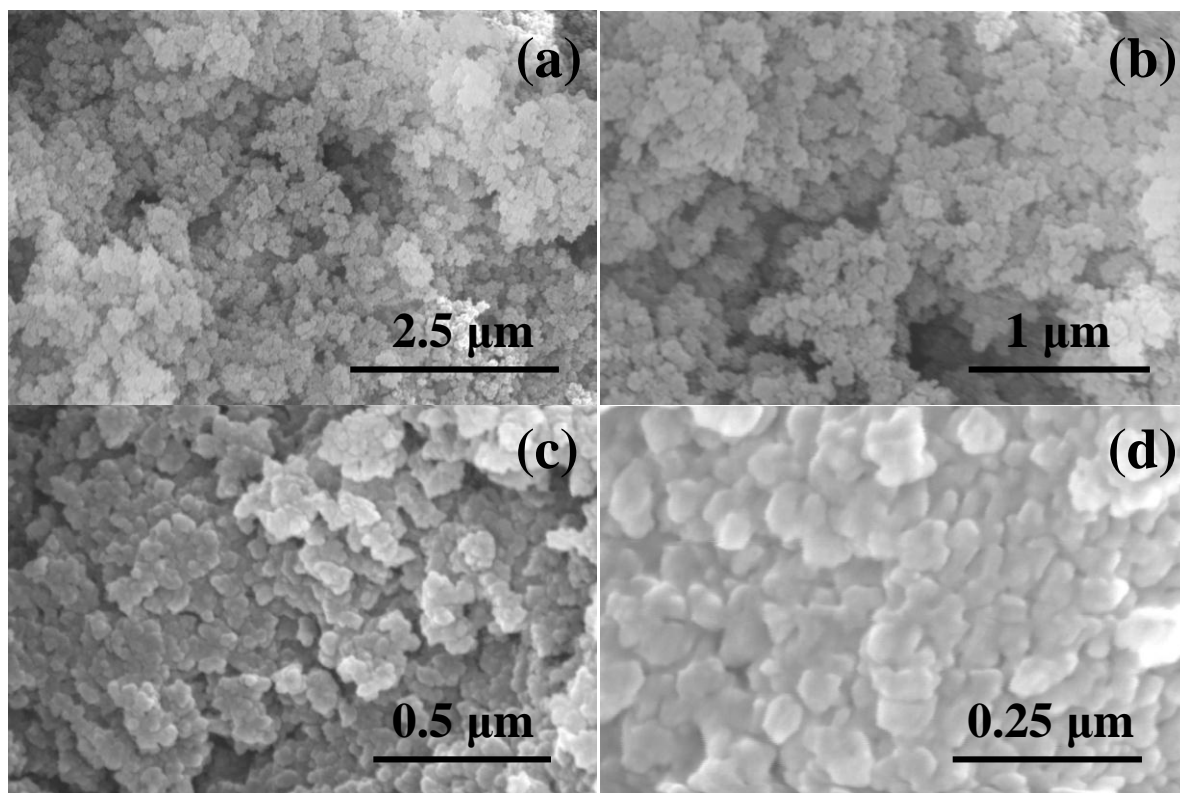

**Fig. S11 (a)-(d)** FESEM images recorded on the  $\alpha$ - $\text{Fe}_2\text{O}_3$  electrodes after long term cycling. The images displayed here are recorded at different magnifications.

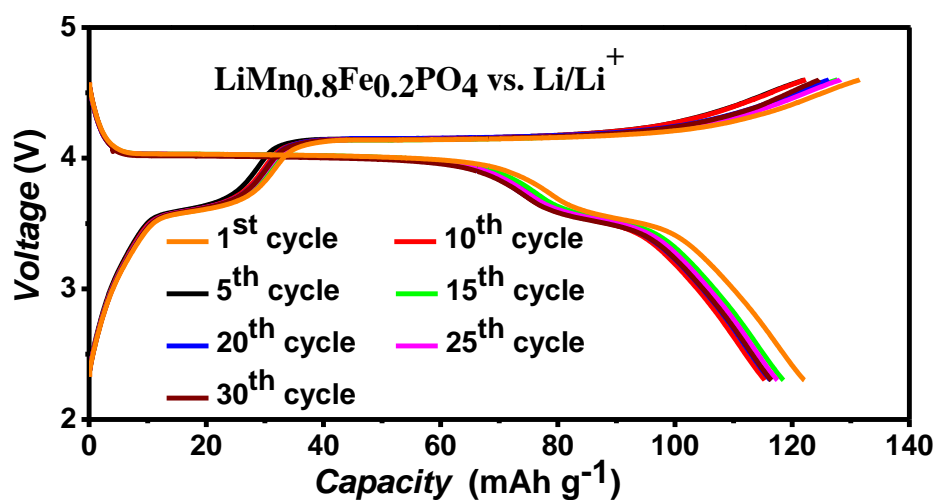

**Fig. S12** Voltage profiles of LiMn<sub>0.8</sub>Fe<sub>0.2</sub>PO<sub>4</sub> vs. Li/Li<sup>+</sup> in the voltage window 2.3-4.5 V at a current rate of 0.2C.

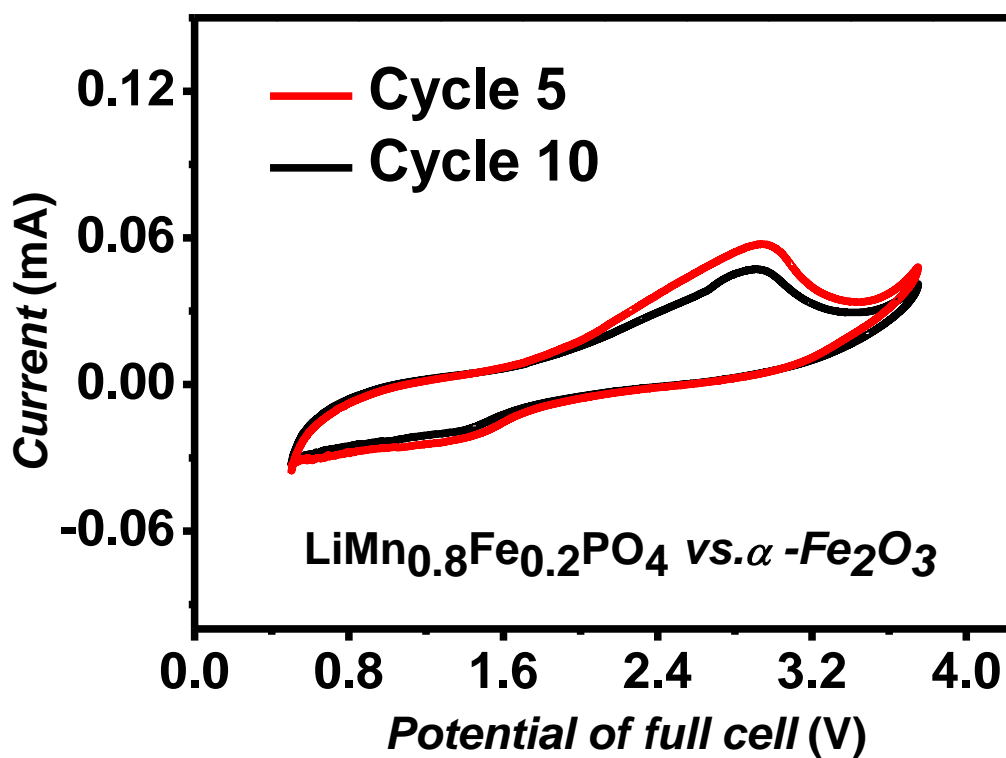

**Fig. S13** Cyclic voltammogram of LiMn<sub>0.8</sub>Fe<sub>0.2</sub>PO<sub>4</sub> vs. Fe<sub>2</sub>O<sub>3</sub> recorded in the voltage window 0.5-3.75 V at a scan rate of 0.2 mV s<sup>-1</sup>.

**Table S1. Assignment of the bands present in the FTIR spectrum**

| Sample                                | Fe-O<br>( $\text{cm}^{-1}$ ) | O-H stretching<br>from surface<br>hydroxyl<br>groups<br>( $\text{cm}^{-1}$ ) | O-H bending<br>from<br>molecular<br>water<br>( $\text{cm}^{-1}$ ) | C-H<br>( $\text{cm}^{-1}$ ) | C=O<br>( $\text{cm}^{-1}$ ) | PVDF<br>( $\text{cm}^{-1}$ ) |
|---------------------------------------|------------------------------|------------------------------------------------------------------------------|-------------------------------------------------------------------|-----------------------------|-----------------------------|------------------------------|
| Fe <sub>2</sub> O <sub>3</sub> powder | 451, 533                     | -                                                                            | -                                                                 | -                           | -                           | -                            |
| Electrode before heat treatment       | 451, 547                     | 3300-3600                                                                    | 1638                                                              | 2852, 2951                  | 2340,<br>2362               | 840-1400                     |
| Electrode after heat treatment        | 449, 531                     | 3317-3354                                                                    | -                                                                 | -                           | 2341-<br>2361               | 840-1400                     |

**Table S2. Comparison of the coulombic efficiency obtained in this work with some literature reports**

| Sample/synthesis methodology                                                                                                              | Current density [mA g <sup>-1</sup> ] | Voltage window [V] | 1 <sup>st</sup> discharge & charge capacities [mAh g <sup>-1</sup> ] | 1 <sup>st</sup> cycle coulombic efficiency [%] | Reference |
|-------------------------------------------------------------------------------------------------------------------------------------------|---------------------------------------|--------------------|----------------------------------------------------------------------|------------------------------------------------|-----------|
| Well-connected $\alpha$ -Fe <sub>2</sub> O <sub>3</sub> by soft template approach assisted with high temperature electrode heat treatment | 100                                   | 0.04-3 V           | 1349/1221                                                            | 90.5                                           | This work |
| Commercial nano $\alpha$ -Fe <sub>2</sub> O <sub>3</sub>                                                                                  | 100                                   | 0.04-3 V           | 1340/716                                                             | 53.4                                           | Figure S6 |
| Sub-micron sized Fe <sub>2</sub> O <sub>3</sub> cubes by hydrothermal synthesis                                                           | 40                                    | 0.01-3 V           | 1089/900                                                             | 82.65                                          | 1         |
| $\alpha$ -Fe <sub>2</sub> O <sub>3</sub> Nano rods/ hydrothermal synthesis                                                                | 201                                   | 0.005-3 V          | 1191/908                                                             | 76.24                                          | 2         |
| $\alpha$ -Fe <sub>2</sub> O <sub>3</sub> reduced graphene oxide                                                                           | 100                                   | 0.005-3 V          | 1693/1227                                                            | 72.47                                          | 3         |
| Porous $\alpha$ -Fe <sub>2</sub> O <sub>3</sub>                                                                                           | 100                                   | 0.01-3 V           | 1647/1163                                                            | 70.6                                           | 4         |
| Mesoporous $\alpha$ -Fe <sub>2</sub> O <sub>3</sub>                                                                                       | 200                                   | 0.005-3 V          | 1730/1200                                                            | 69.36                                          | 5         |
| Fe <sub>2</sub> O <sub>3</sub> nanosheets-G                                                                                               | 0.2C                                  | 0.005-3.0 V        | 1416/1196                                                            | 84.5                                           | 6         |

1. P. Zhang, Z. P. Guo and H. K. Liu, *Electrochimica Acta*, 2010, **55**, 8521-8526.
2. Y.-M. Lin, P. R. Abel, A. Heller and C. B. Mullins, *The Journal of Physical Chemistry Letters*, 2011, **2**, 2885-2891.
3. X. Zhu, Y. Zhu, S. Murali, M. D. Stoller and R. S. Ruoff, *Acs Nano*, 2011, **5**, 3333-3338.
4. X. Yao, C. Tang, G. Yuan, P. Cui, X. Xu and Z. Liu, *Electrochemistry Communications*, 2011, **13**, 1439-1442.
5. B. Sun, J. Horvat, H. S. Kim, W.-S. Kim, J. Ahn and G. Wang, *The Journal of Physical Chemistry C*, 2010, **114**, 18753-18761.
6. X. Wang, W. Tian, D. Liu, C. Zhi, Y. Bando and D. Golberg, 2012, *Nano Energy*.
